# Supplementary material
Source: publisher figshare collection journal article supplement (https://frontiersin.figshare.com/ndownloader/files/18081203)
Supplement: Supplementary file [file 18081203]

**Suppl Figure 5.**

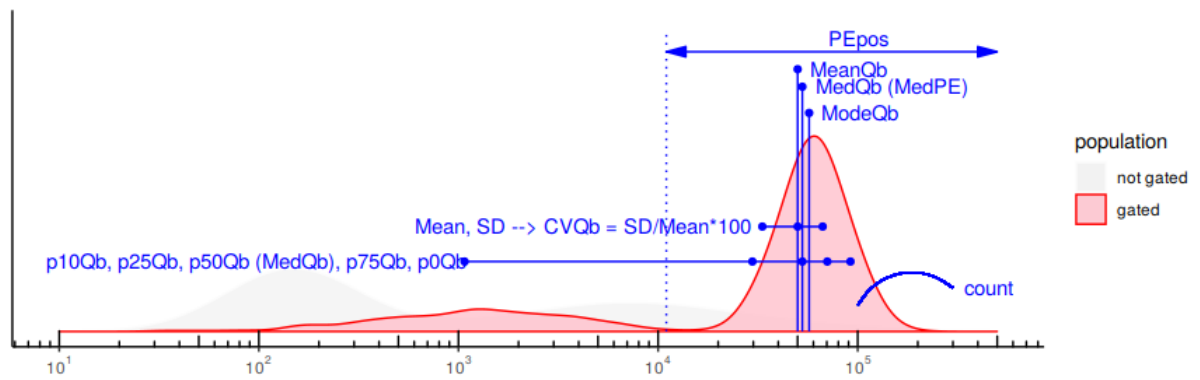

Definition of statistics extracted for each CD marker on the PE channel for each defined subset.
